# Supplementary material for: Active Travel and Mild Cognitive Impairment among Older Adults from Low- and Middle-Income Countries
Source: J Clin Med. 2021 Mar 17;10(6):1243. doi: 10.3390/jcm10061243 (PMC8002501; doi:10.3390/jcm10061243)
Supplement: Supplementary file 1 [file jcm-10-01243-s001.pdf]

## APPENDIX

**Table S1** Prevalence of <-1 SD after adjustment for level of education and age for each cognitive performance test (overall and among those with mild cognitive impairment)

| Cognitive performance test | Overall (%) | MCI (%) |
|----------------------------|-------------|---------|
| Immediate verbal recall    | 15.2        | 43.4    |
| Digit span forward         | 16.2        | 41.4    |
| Digit span backward        | 10.3        | 29.2    |
| Animal naming task         | 12.5        | 24.3    |
| Delayed verbal recall      | 16.3        | 47.8    |

Abbreviation: MCI Mild cognitive impairment

**Table S2** Prevalence of severity of difficulties with activities of daily living (overall and among those with mild cognitive impairment)

| Disability                 | Category | Overall (%) | MCI (%) |
|----------------------------|----------|-------------|---------|
| Difficulty getting dressed | None     | 90          | 85.7    |
|                            | Mild     | 7.9         | 11.2    |
|                            | Moderate | 2.1         | 3.1     |
| Difficulty eating          | None     | 87.8        | 84.2    |
|                            | Mild     | 8.9         | 12      |
|                            | Moderate | 3.3         | 3.8     |

Abbreviation: MCI Mild cognitive impairment

**Table S3** Association between active travel or covariates and mild cognitive impairment (outcome) estimated by multivariable logistic regression

| Characteristic            |                   | Overall<br>OR | 95%CI       | Age 50-64 years<br>OR |             | Age ≥65 years<br>OR |             |
|---------------------------|-------------------|---------------|-------------|-----------------------|-------------|---------------------|-------------|
|                           |                   |               |             | 95%CI                 |             | 95%CI               |             |
| Active travel             | High              | 1.00          |             | 1.00                  |             | 1.00                |             |
|                           | Middle            | 0.97          | [0.84,1.13] | 0.95                  | [0.79,1.14] | 1.04                | [0.82,1.31] |
|                           | Low               | 1.33***       | [1.14,1.54] | 1.07                  | [0.89,1.30] | 1.70***             | [1.32,2.19] |
| Age (years)               |                   | 1.03***       | [1.02,1.04] | 1.03***               | [1.02,1.06] | 1.05***             | [1.04,1.07] |
| Sex                       | Female vs. Male   | 1.19          | [0.99,1.43] | 1.41**                | [1.14,1.74] | 1.01                | [0.76,1.34] |
| Wealth                    | Poorest           | 1.00          |             | 1.00                  |             | 1.00                |             |
|                           | Poorer            | 0.95          | [0.81,1.13] | 0.94                  | [0.76,1.16] | 0.90                | [0.69,1.18] |
|                           | Middle            | 1.06          | [0.87,1.28] | 0.90                  | [0.71,1.14] | 1.21                | [0.90,1.62] |
|                           | Richer            | 0.71***       | [0.59,0.86] | 0.70**                | [0.55,0.89] | 0.63***             | [0.48,0.82] |
|                           | Richest           | 0.48***       | [0.38,0.60] | 0.39***               | [0.29,0.52] | 0.58**              | [0.42,0.81] |
| Education (years)         |                   | 1.00          | [0.98,1.02] | 0.99                  | [0.97,1.02] | 1.00                | [0.98,1.03] |
| Setting                   | Rural vs. Urban   | 0.59***       | [0.50,0.69] | 0.61***               | [0.50,0.75] | 0.61***             | [0.48,0.77] |
| Alcohol consumption       | Yes vs. No        | 1.02          | [0.86,1.20] | 0.98                  | [0.80,1.19] | 1.16                | [0.87,1.54] |
| Smoking                   | Never             | 1.00          |             | 1.00                  |             | 1.00                |             |
|                           | Current           | 1.13          | [0.95,1.34] | 1.16                  | [0.96,1.41] | 1.19                | [0.88,1.61] |
|                           | Past              | 1.15          | [0.93,1.43] | 1.16                  | [0.85,1.59] | 1.17                | [0.85,1.61] |
| Sleep problems            | Yes vs. No        | 2.02***       | [1.61,2.53] | 1.86***               | [1.36,2.55] | 2.16***             | [1.60,2.92] |
| Anxiety                   | Yes vs. No        | 1.47*         | [1.04,2.09] | 1.64*                 | [1.00,2.69] | 1.31                | [0.82,2.08] |
| Depression                | Yes vs. No        | 0.85          | [0.62,1.15] | 0.86                  | [0.59,1.28] | 0.80                | [0.51,1.27] |
| Diabetes                  | Yes vs. No        | 1.16          | [0.92,1.45] | 1.38                  | [0.98,1.94] | 1.03                | [0.78,1.37] |
| Hypertension              | Yes vs. No        | 1.02          | [0.92,1.14] | 0.97                  | [0.85,1.10] | 1.12                | [0.93,1.35] |
| Stroke                    | Yes vs. No        | 1.94***       | [1.51,2.49] | 2.39***               | [1.61,3.54] | 1.56**              | [1.11,2.19] |
| Obesity                   | Yes vs. No        | 1.34*         | [1.07,1.68] | 1.53**                | [1.15,2.04] | 1.16                | [0.83,1.62] |
| Work physical activity    | ≤150 min per week | 1.00          |             | 1.00                  |             | 1.00                |             |
|                           | >150 min per week | 1.11          | [0.99,1.24] | 1.29**                | [1.10,1.52] | 0.93                | [0.79,1.10] |
| Leisure physical activity | ≤150 min per week | 1.00          |             | 1.00                  |             | 1.00                |             |
|                           | >150 min per week | 0.82          | [0.65,1.03] | 0.85                  | [0.64,1.13] | 0.81                | [0.57,1.15] |

Abbreviation: OR Odds ratio; CI Confidence interval; Models are adjusted for all variables in the Table and country. \* p<0.05, \*\* p<0.01, \*\*\* p<0.001
